1 **Title:**

2 **Factors associated with human papillomavirus, hepatitis A, hepatitis B and**  
3 **mpox vaccination uptake among gay, bisexual and other men who have sex**  
4 **with men in the UK – findings from the large community-based RiISH-Mpox**  
5 **survey**

6  
7 **Authors:**

8 George Baldry (george.baldry@ukhsa.gov.uk) <sup>1,2</sup>  
9 Dawn Phillips <sup>1</sup> (dawn.phillips@ukhsa.gov.uk)  
10 Ruth Wilkie <sup>1</sup> (ruth.wilkie@ukhsa.gov.uk)  
11 Marta Checchi <sup>1</sup> (marta.checchi@ukhsa.gov.uk)  
12 Kate Folkard <sup>1</sup> (kate.folkard@ukhsa.gov.uk)  
13 Ruth Simmons <sup>1</sup> (ruth.simmons@ukhsa.gov.uk)  
14 John Saunders <sup>1,2,3</sup> (john.saunders@ukhsa.gov.uk)  
15 Sema Mandal <sup>1</sup> (sema.mandal@ukhsa.gov.uk)  
16 Catherine H Mercer <sup>2,3</sup> (c.mercer@ucl.ac.uk)  
17 Hamish Mohammed <sup>1,2,3</sup> (hamish.mohammed@ukhsa.gov.uk)  
18 Dana Ogaz <sup>1,3</sup> (dana.ogaz@ukhsa.gov.uk)

19  
20 **Affiliations:**

21 <sup>1</sup> Blood Safety, Hepatitis, STI & HIV Division, UK Health Security Agency, London, United  
22 Kingdom  
23 <sup>2</sup> Institute for Global Health, University College London, London, United  
24 Kingdom  
25 <sup>3</sup> The National Institute for Health and Care Research Health Protection Research Unit in  
26 Blood Borne and Sexually Transmitted Infections at University College London in  
27 partnership with the UK Health Security Agency, London, United Kingdom

28  
29 **Word count:** (2848/3000)

30  
31 **Key words:** Mpox, Viral Hepatitis, HPV, Vaccine Uptake, GBMSM, UK  
32

33 **Abstract (249/250)**

34  
35 **Background:** Gay, bisexual, and other men who have sex with men (GBMSM) face a  
36 disproportionate burden of sexually transmitted infections and are eligible for targeted  
37 vaccinations for hepatitis A (HAV), hepatitis B (HBV), human papilloma virus (HPV) and  
38 mpox. This study examines the sociodemographic characteristics, sexual behaviours, and  
39 sexual healthcare service (SHS) use associated with vaccination uptake.

40 **Methods:** We undertook analyses of RiISH-Mpox - an online, community-based survey with  
41 GBMSM recruited via social media and dating apps. We calculated vaccination uptake ( $\geq 1$

NOTE: This preprint reports new research that has not been certified by peer review and should not be used to guide clinical practice.

42 dose) among eligible GBMSM. Bivariate and multivariable logistic regression was performed  
43 to identify factors independently associated with vaccination uptake among eligible  
44 participants.

45 **Results:** Reported uptake in eligible GBMSM was around two-thirds for each of the  
46 vaccinations considered: mpox 69% (95% confidence interval (CI): 66%-72%), HAV 68%  
47 (CI:65%-70%), HBV 72% (CI:69%-74%) and HPV 65% (CI:61%-68%). Vaccination course  
48 completion (receiving all recommended doses) ranged from 75% (HBV) to 89% (HAV)  
49 among eligible GBMSM. Individuals who represented missed opportunities for vaccination  
50 ranged from 22-30% of eligible SHS attendees. Younger participants, individuals identifying  
51 as bisexual, reporting lower educational qualifications, or being unemployed reported lower  
52 uptake across GBMSM-selective vaccinations. Individuals who reported greater levels of  
53 sexual behaviour and recent SHS use were more likely to report vaccinations.

54 **Conclusion:** Eligible participants reported high uptake of vaccinations; however, uptake was  
55 lower amongst young GBMSM and self-identifying bisexual men. Awareness of groups with  
56 lower vaccination uptake will help inform practice, delivery strategies and health promotion,  
57 to improve the reach and impact of vaccinations amongst GBMSM.

#### 58 **Contributions:**

59 DP, RW, KF, CHM, JS, HM reviewed and updated the survey instrument. Survey  
60 implementation, data collection and data management were carried out by RW and DO. GB,  
61 CM, DO, HM curated secondary analysis plan with review and contributions from KF, MC,  
62 JS, RS, SM. GB conducted analysis and completed the first manuscript draft. All authors  
63 contributed to successive drafts and reviewed and approved the final manuscript.

#### 64 **Ethics statement:**

65 Ethical approval of this study was provided by the UKHSA Research and Ethics Governance  
66 Group (REGG; ref: R&D 524). Online informed consent was received from all participants  
67 and all methods were performed in accordance with guidelines and regulations set by the  
68 UKHSA REGG.

#### 69 **Competing interests:**

70 Authors have no competing interests to declare.

#### 71 **Data availability statement:**

72 The data that support the findings of this study are available upon reasonable request from the  
73 UK Health Security Agency (UKHSA). Requests can be directed to Dr Hamish Mohammed  
74 ([hamish.mohammed@ukhsa.gov.uk](mailto:hamish.mohammed@ukhsa.gov.uk)).

#### 75 **Funding:**

76 This study did not receive any funding and was conducted as part of the UKHSA public  
77 health response to mpox.

#### 78 **Acknowledgements:**

79 The authors wish to thank all the participants who took part in this study. We acknowledge  
80 members of the National Institute for Health and Care Research Health Protection Research  
81 Unit (NIHR HPRU) in Blood Borne and Sexually Transmitted Infections (BBSTI) Steering  
82 Committee: Professor Caroline Sabin (HPRU Director), Dr John Saunders (UK Health  
83 Security Agency Lead), Professor Catherine Mercer, Dr Hamish Mohammed (previously  
84 Professor Gwenda Hughes), Professor Greta Rait, Dr Ruth Simmons, Professor William  
85 Rosenberg, Dr Tamyo Mbisa, Professor Rosalind Raine, Dr Sema Mandal, Dr Rosamund  
86 Yu, Dr Samreen Ijaz, Dr Fabiana Lorencatto, Dr Rachel Hunter, Dr Kirsty Foster and Dr  
87 Mamooma Tahir. The authors would also like to thank Takudzwa Mukiwa (Terrence Higgins  
88 Trust) and Will Nutland (The Love Tank) for their review of the mpox module in the RiiSH-  
89 Mpox survey used for this research.

90

91

92

## 93 **Introduction**

94  
95

96 Gay, bisexual, and other men who have sex with men (GBMSM) continue to be  
97 disproportionately affected by sexually transmitted infections (STIs) and viral hepatitis  
98 (VHs) both globally<sup>1</sup> and in the UK<sup>2</sup>. To reduce individual and public health impacts of these  
99 infections in the UK, several vaccines are recommended for GBMSM<sup>3-6</sup>, this includes HPV  
100 (human papilloma virus), Hepatitis A (HAV) and Hepatitis B (HBV), which can be spread  
101 through sexual contact amongst other means<sup>7</sup>.

102

103 UK immunisation policy and clinical advice is outlined in The Green Book: Immunisation  
104 against Infectious Disease, a compilation of immunisation evidence, procedures, and  
105 guidance for vaccine preventable diseases<sup>8</sup>. The UK currently recommends opportunistic  
106 immunisation against HAV and HBV to all GBMSM, particularly those who change sexual  
107 partners frequently<sup>3,7</sup>. HPV vaccination in the UK was initially introduced for girls aged 12-  
108 13 to prevent cervical cancer<sup>9</sup>, but was recommended for GBMSM up to and including age 45  
109 from 2016 and for adolescent boys from 2019<sup>5</sup>. Most recently, GBMSM-selective  
110 vaccination programmes have been brought into focus through the rapid introduction of  
111 vaccination for mpox in response to the 2022 mpox outbreak which particularly affected this  
112 group<sup>10</sup>.

113

114 There is limited literature examining STI/VH vaccination uptake and acceptability among  
115 GBMSM. While a pilot study among UK GBMSM found that 89% would willingly receive  
116 the HPV vaccine upon recommendation<sup>11</sup>, reported uptake of the HPV vaccine is only 34%  
117 among GBMSM attending sexual health services (SHS) in England (uptake has also likely  
118 decreased due to the impact of COVID-19 on SHS in-person service delivery)<sup>12</sup>. Data on  
119 HAV/HBV vaccination uptake among GBMSM in England is also very limited.

120

121 To understand STI/VH vaccination uptake inequalities, we investigated the factors associated  
122 with uptake of recommended STI/VH vaccines in the UK among a community-sample of  
123 GBMSM.

124

## 125 **Methods**

126

### 127 **Study design and Data collection**

128

129 This study used data collected by the 2022 round of the ‘Reducing inequalities in Sexual  
130 Health during the mpox outbreak’ (RiiSH-mpox) survey, part of a series of cross-sectional  
131 community-based surveys first run in 2017<sup>13</sup>. The RiiSH surveys focus on health and  
132 wellbeing, sexual risk behaviours, and use of SHS amongst GBMSM, and have been used to  
133 improve understanding of the factors underlying STI trends among GBMSM in the UK<sup>14,15</sup>.  
134 RiiSH-Mpox included questions on these core topics as well as mpox vaccine uptake during

135 the 2022 mpox outbreak. Details of the RiiSH-Mpox methodology have been previously  
136 reported<sup>15</sup>.

137

138 The RiiSH-Mpox survey was deployed from 24 November-19 December 2022 and included  
139 participants that were aged  $\geq 16$  years, a UK resident, individuals self-identifying as men  
140 (cisgender/transgender), transgender women, or gender-diverse individuals assigned male at  
141 birth (gender was overlooked in this analysis, 99% self-identified as a cis-male), and  
142 individuals who self-reported having had sex with a man in the last year. Participants were  
143 recruited through advertisements on social media (Facebook, Instagram, Twitter [now X])  
144 and through the geospatial networking application ('dating app') Grindr. Online consent was  
145 provided by all participants. Lookback periods for healthcare-related factors and sexual risk  
146 behaviours varied from reporting since August 2022 (i.e. last 3-4 months), to ever.

147

148 Due to relatively low numbers of participants who did not self-report being white or  
149 gay/homosexual these variables were dichotomised as white or any other ethnic group, and  
150 either gay/homosexual or bisexual, respectively.

151

## 152 **Data analysis**

153

### 154 **Vaccination uptake**

155

156 To measure uptake and completion levels of vaccination, percentages and 95% confidence  
157 intervals (CI) (Clopper-Pearson) were calculated. Uptake was defined as receiving at least  
158 one dose of a vaccine and completion as receiving all recommended doses as outlined by the  
159 UK vaccination guidance at the time of the survey (2 doses of HAV, HPV or mpox vaccine  
160 and 3 HBV vaccine doses).

161

162 Uptake amongst all participants and eligible GBMSM for each vaccine was calculated.  
163 Reflecting UK vaccination guidance<sup>3</sup>, we considered all GBMSM as eligible for HAV and  
164 HBV vaccination. HPV vaccination eligibility was considered in GBMSM reporting SHS  
165 attendance who were up to and including age 45, given opportunistic vaccination  
166 recommendations across SHS. In line with mpox vaccination guidance<sup>6,10</sup>, mpox vaccination  
167 eligibility was considered in those reporting:  $\geq 10$  physical male sex partners, meeting  
168 partners in public sex environments (Sex on premise venues (SOP), cruising grounds or sex  
169 parties), having a positive STI test, report of HIV-PrEP or use of chemsex-associated  
170 recreational drugs (crystal methamphetamine, mephedrone or gamma-  
171 hydroxybutyrate/gamma-butyrolactone). SHS attendance was not considered as part of  
172 eligibility for HAV, HBV and mpox vaccination given vaccination availability outside of  
173 SHS (e.g. mpox vaccination outreach, general practice and travel clinic availability for VH  
174 vaccination).

175

176 To measure the association between uptake of different vaccine types, logistic regression was  
177 used to generate the unadjusted (uOR) and adjusted odds ratio (aOR) of receiving at least one

178 dose of a respective vaccine versus also receiving at least one dose of another vaccine  
179 (vaccines were compared sequentially, in a pairwise manner). For adjusted analyses, age-  
180 group and sexual orientation were considered a priori, and additional factors were added in a  
181 forwards stepwise manner based on significant bivariate association and evidence from  
182 previous literature<sup>11,16-19</sup>.

183

### 184 **Missed vaccination opportunities in those attending sexual health services**

185

186 GBMSM who reported ever having attended an SHS and who met respective proxy  
187 vaccination eligibility were considered missed opportunities for vaccination if no vaccination  
188 history was reported.

189

### 190 **Factors associated with vaccination uptake**

191

192 Among all participants irrespective of previous SHS attendance (except those over age 45/  
193 those who had not previously attended SHS for HPV vaccination), Pearson's chi-squared test  
194 and bivariate logistic regression was used to examine association between sociodemographic,  
195 sexual behaviour and health-related factors with vaccination uptake for the HAV, HBV and  
196 HPV vaccines, respectively. Analysis of factors associated with vaccination for mpox uptake  
197 has been previously reported<sup>15</sup> so was not examined in this analysis. Multivariable adjustment  
198 for significant sociodemographic, sexual behaviour and health-related factors, as per methods  
199 described above, was applied.

200

201 All analysis was completed using Stata V17.0 (College Station, TX, USA) and all p values  
202 below 5% were deemed statistically significant.

203

204

## 205 **Results**

206 Altogether, 1435 individuals engaged with RiiSH-Mpox survey, of whom 1333 met the  
207 inclusion criteria. Of these, half were aged over 45 years, 37% were 30-44 and the remaining  
208 13% were 16-29. Almost all self-identified as gay/homosexual (89%) and were of white  
209 ethnicity (92%). Most lived in England (86%), 81% were employed, 37% reported at least  
210 degree level education, with 48% responding that they were financially comfortable. See  
211 Appendix A for sample characteristics.

212

### 213 **Vaccination Uptake**

214

215 Among all participants, 97% self-reported receiving at least one dose of any STI/VH  
216 vaccination. HAV vaccination uptake was 68% (CI:65%-70%, 903/1333) and HBV  
217 vaccination was 72% (CI:69%-74, 954/1333). Mpox vaccination uptake among eligible  
218 participants was 69% (CI:66%-72%, 601/875), or 52% (CI:49%-55%, 692/1,333) among all

219 GBMSM. In those under age 45 who had ever attended a SHS, HPV vaccination was 73%  
220 (CI:69%-76%, 417/574), or 42% (CI:39%-45%, 562/1333) among all participants.

221

222 Receiving one vaccine type was uniformly associated with receiving at least one other  
223 (Appendix B). The highest association was found between the HAV and HBV vaccines,  
224 individuals who had received one were 12 times more likely to have received at least one  
225 dose of the other (aOR:11.98, CI: 9.01-15.92).

226

## 227 **Vaccine Completion**

228

229 HAV vaccination had the highest completion level amongst participants with 89% (CI:87%-  
230 91%, 807/903) of those that had received at least one dose completing the course. Among  
231 individuals that initiated HBV vaccination, 75% completed the course (CI:72%-77%,  
232 712/954). Of those that had initiated HPV vaccination 84% (CI:80%-88%, 350/ 417) had  
233 completed the course and 42% (CI:38%-45%, 288/692) of those that had initiated vaccination  
234 for mpox completed the course.

235

## 236 **Missed vaccination opportunities in those attending sexual health services**

237

238 Missed vaccination opportunities among GBMSM who ever reported SHS attendance history  
239 were considered 27% (CI:24-29%) for HAV vaccination, 22% (CI:20-25%) for HBV  
240 vaccination, 27% (CI: 26-33%) for HPV vaccination, and 30% (CI: 26-33%) for mpox  
241 vaccination.

242

## 243 **Factors associated with vaccination uptake**

244

### 245 **Hepatitis A Vaccination uptake**

246

247 There was a bivariate association between HAV uptake and sexual orientation, educational  
248 level, and employment status, see Table 2. There were significantly lower odds of HAV  
249 vaccination amongst those self-reporting as bisexual (aOR:0.56, (CI:0.4-0.8) vs  
250 gay/homosexual), having an education that was below degree-level (aOR:0.7, (CI:0.55-0.9))  
251 and being unemployed (aOR:0.69, (CI:0.52-0.92)). There was no evidence of an independent  
252 association existing between HAV vaccination uptake and age, however uptake was lower in  
253 both the 16-29 age group (aOR:0.54, (CI:0.37-0.78)) and the over 45 age group (aOR:0.74,  
254 (CI:0.57-0.97)).

255

256 Sexual behaviours associated with HAV vaccination uptake included self-reported usage of  
257 chemsex-related recreational drugs in the previous year (aOR:1.87, (CI:1.16-3.02)), reporting  
258 ten or more male physical sex partners (aOR:1.85, (CI:1.4-2.44)), reporting attendance at  
259 SOP venues (aOR:1.58, (CI:1.22-2.05)), self-reporting  $\geq 10$  condomless anal sex (CAS)  
260 partners (aOR:1.44, (CI:1.12-1.86)) (all since Aug 2022). Health related factors associated  
261 with HAV vaccination uptake included self-reporting being a person living with HIV

262 (PLWHIV) (aOR:2, (CI:1.38-2.88)), receiving a positive STI test in the past year (aOR:1.95,  
263 (CI:1.29-2.96)), visiting a SHS in the past year, (aOR:4.31, (CI:3.36-5.54)), STI test in the  
264 past year (aOR:3.25, (CI:2.53-4.18)) and reporting usage of HIV-PrEP since December 2021  
265 (aOR:3.15, (CI:2.43-4.07)).  
266

### 267 **Hepatitis B Vaccination uptake.**

268  
269 There was a bivariate association between HBV uptake and sexual orientation, educational  
270 qualifications, and employment status, see Table 3. There were lower odds of HBV  
271 vaccination uptake in those self-reporting as bisexual (aOR:0.57, (CI:0.39-0.82)) vs  
272 gay/homosexual), having an education that was below degree-level (aOR:0.59, (CI:0.46-  
273 0.76)) and being unemployed (aOR:0.71, (CI:0.53-0.96)). There was no evidence of an  
274 independent association existing between HBV vaccination uptake and age however uptake  
275 was lower in both the 16-29 age group (aOR:0.44, (CI:0.3-0.65)) and the over 45 age group  
276 (aOR:0.53, (CI:0.4-0.7)).  
277

278 Sexual behaviours associated with uptake included reported usage of chemsex-related  
279 recreational drugs in the previous year (aOR:1.75, (CI:1.06-2.88)), reporting ten or more  
280 physical male sex partners (aOR:1.89, (CI:1.41-2.53)) reporting attendance at SOP venues  
281 (aOR:1.51, (CI:1.15-1.99)), self-reporting  $\geq 10$  CAS partners (aOR:1.77, (CI:1.37-2.29)) (all  
282 since Aug 2022). There were associations with reporting being a PLWHIV (aOR:1.84,  
283 (CI:1.26-2.68)), receiving a positive STI test in the past year (aOR:3.17, (CI:1.9-5.29)),  
284 visiting a SHS in the past year, (aOR:5.33, (CI:4.1-6.93)), having an STI test in the past year  
285 (aOR:4.29, (CI:3.31-5.58)) and reporting usage of HIV-PrEP since Dec 2021 (aOR:4.68,  
286 (CI:3.51-6.26)).  
287

### 289 **HPV vaccination uptake**

290  
291 Among eligible individuals the only sociodemographic factors found to have an association  
292 with HPV vaccination uptake were being in the 16-29 (younger) age-category (aOR:0.62,  
293 (CI:0.43-0.89 vs those aged 30-44)) and having an education below degree-level (aOR:0.55,  
294 (CI:0.39-0.78)), see Table 4.  
295

296 The sexual behaviours that were associated with HPV vaccination uptake include usage of  
297 chemsex-related drugs in the previous year (aOR:1.92, (CI:1.01-3.63)), reporting ten or more  
298 physical male sex partners (aOR:3.85, (CI:1.77-8.37)) reporting attendance at SOP venues  
299 (aOR:1.84, (CI:1.26-2.67)), self-reporting  $\geq 10$  CAS partners (aOR:4.27, (CI:2.38-7.65)) (all  
300 since August 2022). There were increased odds of HPV vaccination in a multivariable model  
301 amongst those reporting being a PLWHIV (aOR:3.3, (CI:1.7-6.39)), receiving a positive STI  
302 test in the past year (aOR:7.77, (CI:3.5-17.28)), visiting a SHS in the past year (aOR:14.3,  
303 (CI:9.51-21.51)), STI test in the past year (aOR:7.74, (CI:5.14-11.65)) and reporting usage of  
304 HIV-PrEP since December 2021 (aOR:4.12, (aOR:8.99, (CI:5.97-13.53))).



305

306

## 307 Discussion

308 Analyses of a large, community-based survey of GBMSM in the UK show that vaccination  
309 uptake was high but far from universal for all targeted vaccinations, with uptake at around  
310 two-thirds across each of the STI/VH vaccinations considered. In GBMSM attending SHS,  
311 approximately a quarter were considered potential missed opportunities for vaccination  
312 across each vaccine type. There was highly correlated uptake between different vaccines and  
313 similar sociodemographic, behavioural and SHS use factors were associated with uptake of  
314 each STI/VH vaccine. This provides an important insight into HAV, HBV and HPV  
315 vaccination uptake amongst GBMSM for which there is limited uptake data in the UK<sup>21</sup>.

316 The sociodemographic factors identified in this study found to commonly be associated with  
317 lower vaccination uptake were younger age, self-identifying as bisexual, and markers of  
318 lower financial or social capital such as an education below degree-level or being  
319 unemployed. Vaccination uptake was higher amongst those reporting sexual behaviour which  
320 increases risk of STI transmission, and relatedly, in those reporting recent SHS use (greater  
321 sexual behaviour is often associated with SHS utilisation<sup>20</sup>); indicating that those who are  
322 most at need of vaccines are receiving them. This mirrors findings of a previous analysis of  
323 mpox vaccination uptake<sup>15</sup>. Vaccine completion ranged from 42% for mpox to 89% for  
324 HAV. The lower completion rate for the mpox vaccination is likely due to the recency of  
325 implementation of the vaccination in response to the outbreak in 2022, as well as the fact that  
326 the offer of second doses only commenced 2-3 months prior to the survey<sup>10</sup>.

327 The lower odds of vaccination amongst younger age groups has previously been reported in  
328 other studies assessing HBV and HPV vaccination<sup>16,19,21</sup>. Gay self-identification, higher  
329 levels of education and employment were also consistently found to be linked with higher  
330 vaccination uptake amongst GBMSM, including both HBV and HPV vaccinations<sup>16,18,21</sup>.  
331 Young people and bisexual/straight-identifying GBMSM have been identified as groups that  
332 have a higher sexual risk and a lower SHS engagement<sup>22-24</sup>. Promotion focused on bisexual  
333 men is important to reduce the burden of these vaccine preventable STI/VHs amongst  
334 GBMSM, but also potentially amongst women<sup>25</sup>.

335 There is also a consistent association between higher vaccination uptake and SHS usage  
336 (although HAV/HBV vaccines are also administered outside of SHS). Previous research has  
337 found that GBMSM are not actively seeking out vaccines such as the HPV vaccine<sup>11,17</sup> and  
338 that vaccination for HPV is reliant on recommendation by clinicians<sup>26,27</sup>. It follows that to  
339 become aware of, and to be identified as a candidate for vaccination, they must be attending  
340 SHSs, (HPV vaccination is targeted to GBMSM attending SHS only). This association has  
341 been identified previously with one study finding that 90.9% of GBMSM reporting HPV  
342 vaccination had attended a SHS in the previous year<sup>28</sup> (86% in this sample).

343

344 Those with markers of lower financial or social capital reported lower vaccination uptake,  
345 indicating that health inequalities faced by GBMSM are exacerbated amongst those who  
346 already experience inequity. The effects of marginalisation may be compounded, and this  
347 requires an intersectional approach to understanding these groups and how to target them  
348 effectively. Understanding their behaviour and whether they require changes in policy and  
349 tailored interventions to increase their engagement with SHS, and subsequently uptake of  
350 STI/VH vaccinations, is needed. This could be through health-promotion messaging such as  
351 community outreach programmes and media-based advertisements to reach those who may  
352 not normally access SHS. One means may be through encouraging online SHS<sup>29</sup> to identify  
353 potential vaccination candidates, but this does require online services that are well-integrated  
354 with physical SHS and have good signposting for GBMSM, as vaccination requires  
355 attendance at a physical venue.

356 Vaccine completion is also incredibly important to confer the maximum protection against  
357 infection, amongst this sample many of those that initiated vaccination completed the course  
358 of vaccination. One previous study assessing incomplete vaccination amongst GBMSM in  
359 England found that the most common reason for not receiving additional vaccine doses was  
360 because they were unaware when their next dose was due<sup>26</sup>. This indicates that vaccine  
361 completion requires additional or alternative promotion to encourage that those who receive  
362 their initial dose will continue to receive additional vaccine doses.

363 This study has limitations due to the cross-sectional methodology used. For example, there  
364 may have been recall error as vaccination was self-reported. Also, participants' behaviours  
365 may have changed, and chronology of vaccination relative to behaviour cannot be ascertained  
366 (except vaccination for mpox which only became established June 2022<sup>10</sup>). There may also  
367 be a degree of misclassification bias by retrospectively applying eligibility criteria to  
368 participants as their behaviours may have changed over time.

369 Due to the questions regarding vaccination which fell into the 'ever' lookback period, it is  
370 impossible to know when vaccination occurred, which could explain high association  
371 between HAV and HBV vaccination due to combined packaging of the HAV and HBV  
372 vaccination or administration of the combined (HAV/HBV) Twinrix vaccine.

373 There are also limitations based on the participants' demographics with lower response  
374 numbers from young people and people who did not self-describe as white. This necessitated  
375 dichotomising variables, limiting the quality of these findings for minority groups who also  
376 have an increased burden of STIs<sup>2,30,31</sup>, using dichotomised measures limits this study's  
377 ability to assess inequalities in vaccine access by ethnicity or gender identity. There is also  
378 potential participation bias, for example the sample appears to be more health conscious than  
379 the general GBMSM population. For instance, HPV vaccine uptake within the eligible  
380 sample was 65% compared to 34% of GBMSM nationally<sup>12</sup>. This sample also excludes  
381 GBMSM not using the applications that this survey was advertised on. However, unlike

382 previous studies<sup>28,32</sup> which often focus on those attending SHS, the target population for this  
383 study was the GBMSM community more broadly.

384 Improving uptake is dependent on understanding barriers faced by GBMSM which limit  
385 vaccination uptake. Within the UK, awareness of factors affecting uptake (especially as the  
386 JCVI has advised routine implementation of opportunistic vaccination for mpox<sup>33</sup> and  
387 gonorrhoea [the latter using 4CMenB vaccination<sup>34</sup>]), will help inform practice and health  
388 promotion that aligns with NHS<sup>35</sup> and UKHSA<sup>36</sup> health equity goals. In an international  
389 context, these results could raise awareness of potential limitations in vaccination uptake due  
390 to service provision differences and sociodemographic factors in equivalent and future  
391 GBMSM-selective vaccination programmes.

392

## 393 References

394

- 395 1. Blondeel K, Say L, Chou D, et al. Evidence and knowledge gaps on the disease burden  
396 in sexual and gender minorities: A review of systematic reviews. *International Journal*  
397 *for Equity in Health*; 15. Epub ahead of print 2016. DOI: 10.1186/s12939-016-0304-1.
- 398 2. Mohammed H, Blomquist P, Ogaz D, et al. 100 Years of STIs in the UK: A review of  
399 national surveillance data. *Sexually Transmitted Infections*; 94. Epub ahead of print  
400 2018. DOI: 10.1136/sextrans-2017-053273.
- 401 3. UKHSA. *Chapter 17-Hepatitis A Hepatitis A The disease*, [www.hps.scot.nhs.uk](http://www.hps.scot.nhs.uk) (2022).
- 402 4. UKHSA. *The Green Book on Immunisation - Chapter 18 Hepatitis B*,  
403 <https://www.gov.uk/government/publications/national-antenatal-infections-> (2022).
- 404 5. UKHSA. *Chapter 18a-Human papillomavirus (HPV) Human papillomavirus (HPV)*  
405 *Human papillomavirus (HPV)*. 2023.
- 406 6. UKHSA. *Green Book Chapter 29 Smallpox and monkeypox*,  
407 <https://products.mhra.gov.uk/search/?search=IMVANEX> (2022).
- 408 7. Public Health England. Hepatitis B: the green book, chapter 18. *Immunisation against*  
409 *infectious disease*.
- 410 8. UK Health Security Agency. *Immunisation against infectious disease*,  
411 [https://www.gov.uk/government/publications/immunisation-against-infectious-](https://www.gov.uk/government/publications/immunisation-against-infectious-disease-the-green-book-front-cover-and-contents-page)  
412 *disease-the-green-book-front-cover-and-contents-page* (2021, accessed 22 December  
413 2023).
- 414 9. Szymonowicz KA, Chen J. Biological and clinical aspects of HPV-related cancers.  
415 *Cancer Biology and Medicine*; 17. Epub ahead of print 2020. DOI:  
416 10.20892/j.issn.2095-3941.2020.0370.
- 417 10. Department of Health and Social Care. *Mpox (monkeypox) outbreak: vaccination*  
418 *strategy*, [https://www.gov.uk/guidance/monkeypox-outbreak-vaccination-](https://www.gov.uk/guidance/monkeypox-outbreak-vaccination-strategy)  
419 *strategy*Guidance (2022).
- 420 11. Nadarzynski T, Smith H, Richardson D, et al. Men who have sex with men who do not  
421 access sexual health clinics nor disclose sexual orientation are unlikely to receive the  
422 HPV vaccine in the UK. *Vaccine*; 36. Epub ahead of print 2018. DOI:  
423 10.1016/j.vaccine.2018.06.075.
- 424 12. PHE. *Human papillomavirus (HPV) vaccination uptake in gay, bisexual and other men*  
425 *who have sex with men (MSM)*. 2019.
- 426 13. Wayal S, Reid D, Weatherburn P, et al. Association between knowledge, risk  
427 behaviours, and testing for sexually transmitted infections among men who have sex  
428 with men: findings from a large online survey in the United Kingdom. *HIV Med*; 20.  
429 Epub ahead of print 2019. DOI: 10.1111/hiv.12753.
- 430 14. Ogaz D, Allen H, Reid D, et al. COVID-19 infection and vaccination uptake in men and  
431 gender-diverse people who have sex with men in the UK: analyses of a large, online  
432 community cross-sectional survey (RiiSH-COVID) undertaken November–December  
433 2021. *BMC Public Health*; 23. Epub ahead of print 2023. DOI: 10.1186/s12889-023-  
434 15779-5.
- 435 15. Ogaz D, Enayat Q, Phillips D, et al. O14 Mpox diagnosis history, behavioural risk  
436 modification, and vaccination uptake in gay, bisexual, and other men who have sex  
437 with men in the UK: findings from a large, online community survey (RiiSH-Mpox)

- 438 undertaken December 2022. 2023. Epub ahead of print 2023. DOI: 10.1136/sextrans-  
439 bashh-2023.14.
- 440 16. Ortu G, Barret AS, Danis K, et al. Low vaccination coverage for human papillomavirus  
441 disease among young men who have sex with men, France, 2019. *Eurosurveillance*;  
442 26. Epub ahead of print 2021. DOI: 10.2807/1560-7917.ES.2021.26.50.2001965.
- 443 17. Chin KY, Ekeuku SO, Hamzah MR. The Role of Healthcare Providers in Promoting  
444 Human Papillomavirus Vaccines among Men Who Have Sex with Men: A Scoping  
445 Review. *Vaccines*; 10. Epub ahead of print 2022. DOI: 10.3390/vaccines10060930.
- 446 18. Vet R, de Wit JBF, Das E. Factors associated with hepatitis B vaccination among men  
447 who have sex with men: a systematic review of published research. *International*  
448 *Journal of STD and AIDS*; 28. Epub ahead of print 2017. DOI:  
449 10.1177/0956462415613726.
- 450 19. Brandl M, Schmidt AJ, Marcus U, et al. Are men who have sex with men in Europe  
451 protected from hepatitis B? *Epidemiol Infect.* Epub ahead of print 2020. DOI:  
452 10.1017/S0950268820000163.
- 453 20. Tanton C, Geary RS, Clifton S, et al. Sexual health clinic attendance and non-  
454 attendance in Britain: findings from the third National Survey of Sexual Attitudes and  
455 Lifestyles (Natsal-3). *Sex Transm Infect*; 94. Epub ahead of print 2018. DOI:  
456 10.1136/sextrans-2017-053193.
- 457 21. Nadarzynski T, Frost M, Miller D, et al. Vaccine acceptability, uptake and completion  
458 amongst men who have sex with men: A systematic review, meta-analysis and  
459 theoretical framework. *Vaccine*; 39. Epub ahead of print 2021. DOI:  
460 10.1016/j.vaccine.2021.05.013.
- 461 22. Curtis T, Bennett K, Mcdonagh L, et al. P532 The sexual behaviour and health of  
462 heterosexual-identifying men who have sex with men: a systematic review. 2019.  
463 Epub ahead of print 2019. DOI: 10.1136/sextrans-2019-sti.610.
- 464 23. Brown JRG, Reid D, Howarth AR, et al. Changes in STI and HIV testing and testing need  
465 among men who have sex with men during the UK's COVID-19 pandemic response.  
466 *Sex Transm Infect*; 99. Epub ahead of print 2023. DOI: 10.1136/sextrans-2022-  
467 055429.
- 468 24. Shankar AG, Mandal S, Ijaz S. An outbreak of hepatitis B in men who have sex with  
469 men but identify as heterosexual. *Sexually Transmitted Infections*; 92. Epub ahead of  
470 print 2016. DOI: 10.1136/sextrans-2015-052490.
- 471 25. Geary RS, Tanton C, Erens B, et al. Sexual identity, attraction and behaviour in Britain:  
472 The implications of using different dimensions of sexual orientation to estimate the  
473 size of sexual minority populations and inform public health interventions. *PLoS One*;  
474 13. Epub ahead of print 2018. DOI: 10.1371/journal.pone.0189607.
- 475 26. Armstrong HL, Scholfield C, Symonds Y, et al. Reasons for incomplete STI vaccination  
476 among men who have sex with men in an English sexual health service. *Int J STD AIDS*.  
477 Epub ahead of print 2023. DOI: 10.1177/09564624231165078.
- 478 27. Petit B, Epaulard O. Men having sex with men and the HPV vaccine in France: A low  
479 vaccine coverage that may be due to its infrequent proposal by physicians. *Vaccine*;  
480 38. Epub ahead of print 2020. DOI: 10.1016/j.vaccine.2020.01.049.
- 481 28. Edelstein M, Iyanger N, Hennessy N, et al. Implementation and evaluation of the  
482 human papillomavirus (HPV) vaccination pilot for men who have sex with men  
483 (MSM), England, April 2016 to March 2017. *Eurosurveillance*; 24. Epub ahead of print  
484 2019. DOI: 10.2807/1560-7917.ES.2019.24.8.1800055.

485

- 486 29. Aicken CRH, Estcourt CS, Johnson AM, et al. Use of the internet for sexual health  
487 among sexually experienced persons aged 16 to 44 years: Evidence from a nationally  
488 representative survey of the british population. *Journal of Medical Internet Research*;  
489 18. Epub ahead of print 2016. DOI: 10.2196/JMIR.4373.
- 490 30. Stutterheim SE, Van Dijk M, Wang H, et al. The worldwide burden of HIV in  
491 transgender individuals: An updated systematic review and meta-analysis. *PLoS ONE*;  
492 16. Epub ahead of print 2021. DOI: 10.1371/journal.pone.0260063.
- 493 31. Kcomt L. Profound health-care discrimination experienced by transgender people:  
494 rapid systematic review. *Soc Work Health Care*; 58. Epub ahead of print 2019. DOI:  
495 10.1080/00981389.2018.1532941.
- 496 32. Pollock KG, Wallace LA, Wrigglesworth S, et al. HPV vaccine uptake in men who have  
497 sex with men in Scotland. *Vaccine*; 37. Epub ahead of print 2019. DOI:  
498 10.1016/j.vaccine.2018.11.081.
- 499 33. DHSC. JCVI statement on mpox vaccination as a routine programme,  
500 [https://www.gov.uk/government/publications/mpox-vaccination-programme-jcvi-  
501 advice-10-november/jcvi-statement-on-mpox-vaccination-as-a-routine-  
502 programme#:~:text=The%20JCVI%20advises%20that%20pre,applied%20regardless%2  
503 0of%20HIV%20status](https://www.gov.uk/government/publications/mpox-vaccination-programme-jcvi-advice-10-november/jcvi-statement-on-mpox-vaccination-as-a-routine-programme#:~:text=The%20JCVI%20advises%20that%20pre,applied%20regardless%20of%20HIV%20status). (2023, accessed 4 March 2024).
- 504 34. DHSC. *Independent report JCVI advice on the use of meningococcal B vaccination for  
505 the prevention of gonorrhoea*,  
506 <https://www.gov.uk/government/publications/meningococcal> (2023).
- 507 35. NHS. 2022/23 Priorities and Operational Planning Guidance. *NHS England*.
- 508 36. UKHSA. Achieving more equitable outcomes: UKHSA Health Equity for Health Security  
509 Strategy, [https://ukhsa.blog.gov.uk/2023/11/08/achieving-more-equitable-  
510 outcomes-ukhsa-health-equity-for-health-security-strategy/](https://ukhsa.blog.gov.uk/2023/11/08/achieving-more-equitable-outcomes-ukhsa-health-equity-for-health-security-strategy/) (2023, accessed 4 March  
511 2024).

512

513

|      | Whole sample * |    |                         | Eligible Population † |    |                         | Completion ‡ |      |                         | Missed Opportunity †† |    |                         |
|------|----------------|----|-------------------------|-----------------------|----|-------------------------|--------------|------|-------------------------|-----------------------|----|-------------------------|
|      | n ¶            | %  | 95% confidence interval | n ¶                   | %  | 95% confidence interval | n §          | %    | 95% confidence interval | n ††                  | %  | 95% confidence interval |
| Mpox | 692            | 52 | 49%-55%                 | 601                   | 69 | 66%-72%                 | 252          | 42** | 38%-46%                 | 249                   | 30 | 26-33%                  |
| HAV  | 903            | 68 | 65%-70%                 | 903                   | 68 | 65%-70%                 | 807          | 89   | 87%-91%                 | 318                   | 27 | 24-29%                  |
| HBV  | 954            | 72 | 69%-74%                 | 954                   | 72 | 69%-74%                 | 712          | 75   | 72%-77%                 | 267                   | 22 | 20-25%                  |
| HPV  | 562            | 42 | 39%-45                  | 429                   | 73 | 69%-76%                 | 350          | 84   | 80%-88%                 | 157                   | 27 | 24-31%                  |

\*Uses all 1333 RiSH-Mpox participants as a denominator † uses all eligible RiSH-MPOX participants as a denominator, we considered all GBMSM as eligible for HAV and HBV vaccination. HPV vaccination eligibility was GBMSM reporting SHS attendance under the age of 46, mpox vaccination eligibility was considered in those reporting: ≥10 physical male sex partners, meeting partners in public sex environments (Sex on premise venues (SOP), cruising grounds or sex parties), having a positive STI test, report of PrEP or use of chemsex-associated recreational drugs (crystal methamphetamine, mephedrone or gamma-hydroxybutyrate/gamma-butyrolactone). ‡ Completion is reported as the percentage of those that received the first dose that self-reported completing the vaccine course ¶ Participants with self-reported uptake of ≥1 vaccine dose(s) § Participants with self-reported completion of that respective vaccine course, 2 doses of HAV, HPV Mpox and 3 doses of HBV \*\* Low completion in vaccination for Mpox may be due to recency of vaccine programme implementation ††N is all individuals who have previously attended SHS and are eligible for that particular vaccine, Mpox - 845, HAV/HBV - 1195 and HPV - 574. †† number of individuals who have not been vaccinated despite eligibility and SHS attendance. Note, for HAV and HBV vaccination uptake, the whole sample and eligible populations are the same.

**Table 2.** Sociodemographic characteristics and Health-related and sexual behaviour factors associated with self-reported HAV vaccination uptake among RiSH-Mpox participants

|                                                                       | n total | % of RiSH-Mpox participants | n of HAV vaccinated participants * | % of group vaccinated | % of HAV vaccinated people | uOR ** | 95% confidence interval | P      | aOR § | 95% confidence interval | P      |
|-----------------------------------------------------------------------|---------|-----------------------------|------------------------------------|-----------------------|----------------------------|--------|-------------------------|--------|-------|-------------------------|--------|
| <b>Sociodemographic Characteristics</b>                               |         |                             |                                    |                       |                            |        |                         |        |       |                         |        |
| <b>Age-group</b>                                                      |         |                             |                                    |                       |                            |        |                         |        |       |                         |        |
| 16-29                                                                 | 176     | 13                          | 101                                | 57                    | 11                         | 0.48   | 0.34 - 0.69             |        | 0.54  | 0.37 - 0.78             | 0.570  |
| 30-44                                                                 | 486     | 36                          | 358                                | 74                    | 40                         | 1.00   |                         |        | 1.00  |                         |        |
| 45+                                                                   | 671     | 50                          | 444                                | 66                    | 49                         | 0.70   | 0.54 - 0.90             | 0.570  | 0.74  | 0.57 - 0.97             |        |
| <b>Sexual orientation</b>                                             |         |                             |                                    |                       |                            |        |                         |        |       |                         |        |
| Gay/ homosexual                                                       | 1187    | 89                          | 823                                | 69                    | 91                         | 1.00   |                         |        | 1.00  |                         |        |
| Bisexual †                                                            | 146     | 11                          | 80                                 | 55                    | 9                          | 0.54   | 0.38 - 0.76             | <0.001 | 0.56  | 0.40 - 0.80             | 0.001  |
| <b>Ethnicity</b>                                                      |         |                             |                                    |                       |                            |        |                         |        |       |                         |        |
| White                                                                 | 1223    | 92                          | 832                                | 68                    | 92                         | 1.00   |                         |        | 1.00  |                         |        |
| Other                                                                 | 110     | 8                           | 71                                 | 65                    | 8                          | 0.86   | 0.57 - 1.29             | 0.454  | 0.90  | 0.59 - 1.37             | 0.610  |
| <b>Country of Birth</b>                                               |         |                             |                                    |                       |                            |        |                         |        |       |                         |        |
| UK                                                                    | 1113    | 83                          | 756                                | 68                    | 84                         | 1.00   |                         |        | 1.00  |                         |        |
| Other                                                                 | 220     | 17                          | 147                                | 67                    | 16                         | 0.95   | 0.70 - 1.29             | 0.748  | 0.91  | 0.66 - 1.26             | 0.586  |
| <b>Country of Residence</b>                                           |         |                             |                                    |                       |                            |        |                         |        |       |                         |        |
| England                                                               | 1148    | 86                          | 779                                | 68                    | 86                         | 1.00   |                         |        | 1.00  |                         |        |
| Rest of UK                                                            | 185     | 14                          | 124                                | 67                    | 14                         | 0.96   | 0.69 - 1.34             | 0.823  | 0.98  | 0.70 - 1.37             | 0.904  |
| <b>Educational level</b>                                              |         |                             |                                    |                       |                            |        |                         |        |       |                         |        |
| Degree level or higher                                                | 495     | 37                          | 594                                | 71                    | 66                         | 1.00   |                         |        | 1.00  |                         |        |
| Below degree level                                                    | 838     | 63                          | 309                                | 62                    | 34                         | 0.68   | 0.54 - 0.86             | 0.001  | 0.70  | 0.55 - 0.90             | 0.050  |
| <b>Employment</b>                                                     |         |                             |                                    |                       |                            |        |                         |        |       |                         |        |
| Currently Employed                                                    | 1074    | 19                          | 749                                | 70                    | 83                         | 1.00   |                         |        | 1.00  |                         |        |
| Not Employed                                                          | 259     | 81                          | 154                                | 59                    | 17                         | 0.64   | 0.48 - 0.84             | 0.002  | 0.69  | 0.52 - 0.92             | 0.012  |
| <b>Household Composition</b>                                          |         |                             |                                    |                       |                            |        |                         |        |       |                         |        |
| Alone                                                                 | 506     | 38                          | 552                                | 67                    | 61                         | 1.00   |                         |        | 1.00  |                         |        |
| With Others                                                           | 827     | 62                          | 351                                | 69                    | 39                         | 0.87   | 0.70 - 1.12             | 0.321  | 0.88  | 0.69 - 1.12             | 0.307  |
| <b>Relationship Status</b>                                            |         |                             |                                    |                       |                            |        |                         |        |       |                         |        |
| Relationship                                                          | 591     | 44                          | 510                                | 86                    | 56                         | 1.00   |                         |        | 1.00  |                         |        |
| Single                                                                | 742     | 56                          | 393                                | 53                    | 44                         | 1.11   | 0.88 - 1.40             | 0.870  | 1.08  | 0.85 - 1.37             | 0.540  |
| <b>Comfortable Financial Status</b>                                   |         |                             |                                    |                       |                            |        |                         |        |       |                         |        |
| Yes ††                                                                | 693     | 52                          | 453                                | 65                    | 50                         | 1.00   |                         |        | 1.00  |                         |        |
| No                                                                    | 640     | 48                          | 450                                | 70                    | 50                         | 0.80   | 0.63 - 1.00             | 0.054  | 0.93  | 0.73 - 1.18             | 0.551  |
| <b>Health-related factors</b>                                         |         |                             |                                    |                       |                            |        |                         |        |       |                         |        |
| <b>HIV Status</b>                                                     |         |                             |                                    |                       |                            |        |                         |        |       |                         |        |
| Negative/ Unknown                                                     | 1131    | 85                          | 744                                | 66                    | 82                         | 1.00   |                         |        | 1.00  |                         |        |
| PLWHIV                                                                | 202     | 15                          | 159                                | 79                    | 18                         | 1.92   | 1.34 - 2.75             | <0.001 | 2.00  | 1.38 - 2.88             | <0.001 |
| <b>MPOX-related behaviour modification ¶</b>                          |         |                             |                                    |                       |                            |        |                         |        |       |                         |        |
| No                                                                    | 626     | 47                          | 412                                | 66                    | 46                         | 1.00   |                         |        | 1.00  |                         |        |
| Yes                                                                   | 707     | 53                          | 491                                | 69                    | 54                         | 1.18   | 0.94 - 1.49             | 0.157  | 1.11  | 0.88 - 1.42             | 0.355  |
| <b>STI Positive Test</b>                                              |         |                             |                                    |                       |                            |        |                         |        |       |                         |        |
| No                                                                    | 1177    | 70                          | 778                                | 66                    | 86                         | 1.00   |                         |        | 1.00  |                         |        |
| Yes                                                                   | 156     | 30                          | 125                                | 80                    | 14                         | 3.38   | 2.63 - 4.35             | <0.001 | 1.95  | 1.29 - 2.96             | 0.002  |
| <b>Visited SHC in past year</b>                                       |         |                             |                                    |                       |                            |        |                         |        |       |                         |        |
| No                                                                    | 478     | 36                          | 221                                | 46                    | 24                         | 1.00   |                         |        | 1.00  |                         |        |
| Yes                                                                   | 855     | 64                          | 682                                | 80                    | 76                         | 4.58   | 3.59 - 5.86             | <0.001 | 4.31  | 3.36 - 5.54             | <0.001 |
| <b>STI test in past year</b>                                          |         |                             |                                    |                       |                            |        |                         |        |       |                         |        |
| No                                                                    | 405     | 30                          | 196                                | 48                    | 22                         | 3.41   |                         |        | 1.00  |                         |        |
| Yes                                                                   | 928     | 70                          | 707                                | 76                    | 78                         | 1.00   | 2.67 - 4.37             | <0.001 | 3.25  | 2.53 - 4.18             | <0.001 |
| <b>PrEP Use in Past Year</b>                                          |         |                             |                                    |                       |                            |        |                         |        |       |                         |        |
| No                                                                    | 734     | 55                          | 415                                | 57                    | 46                         | 1.00   |                         |        | 1.00  |                         |        |
| Yes                                                                   | 599     | 45                          | 488                                | 81                    | 54                         | 3.38   | 2.63 - 4.35             | <0.001 | 3.15  | 2.43 - 4.07             | <0.001 |
| <b>Sexual behaviours</b>                                              |         |                             |                                    |                       |                            |        |                         |        |       |                         |        |
| <b>Usage of chemsex-related drugs in the previous year</b>            |         |                             |                                    |                       |                            |        |                         |        |       |                         |        |
| No                                                                    | 1222    | 92                          | 815                                | 67                    | 90                         | 1.00   |                         |        | 1.00  |                         |        |
| Yes                                                                   | 111     | 8                           | 88                                 | 79                    | 10                         | 1.91   | 1.19 - 3.07             | 0.007  | 1.87  | 1.16 - 3.02             | 0.010  |
| <b>Number of Male Physical Sex Partners</b>                           |         |                             |                                    |                       |                            |        |                         |        |       |                         |        |
| none                                                                  | 100     | 8                           | 64                                 | 64                    | 7                          | 1.00   |                         |        | 1.00  |                         |        |
| 1                                                                     | 180     | 14                          | 93                                 | 52                    | 10                         | 0.60   | 0.36 - 0.99             |        | 0.59  | 0.35 - 0.98             | <0.001 |
| 2 to 4                                                                | 389     | 29                          | 256                                | 66                    | 28                         | 1.08   | 0.68 - 1.71             |        | 1.05  | 0.66 - 1.68             |        |
| 5 to 9                                                                | 280     | 21                          | 192                                | 69                    | 21                         | 1.23   | 0.76 - 1.98             |        | 1.17  | 0.72 - 1.90             |        |
| 10+                                                                   | 384     | 29                          | 298                                | 78                    | 33                         | 1.95   | 1.21 - 3.13             | 0.006  | 1.78  | 1.10 - 2.88             |        |
| <b>reported use of SOP venues in the lookback period</b>              |         |                             |                                    |                       |                            |        |                         |        |       |                         |        |
| No                                                                    | 888     | 67                          | 568                                | 64                    | 63                         | 1.00   |                         |        | 1.00  |                         |        |
| Yes                                                                   | 445     | 33                          | 335                                | 75                    | 37                         | 1.72   | 1.33 - 2.21             | <0.001 | 1.58  | 1.22 - 2.05             | <0.001 |
| <b>Number of CAS partners in the lookback period (since Dec 2021)</b> |         |                             |                                    |                       |                            |        |                         |        |       |                         |        |
| none                                                                  | 401     | 30                          | 245                                | 61                    | 27                         | 1.00   |                         |        | 1.00  |                         |        |
| 1                                                                     | 263     | 20                          | 159                                | 60                    | 18                         | 0.97   | 0.71 - 1.34             |        | 0.94  | 0.68 - 1.29             | <0.001 |
| 2 to 4                                                                | 315     | 24                          | 219                                | 70                    | 24                         | 1.45   | 1.06 - 1.99             |        | 1.42  | 1.03 - 1.95             |        |
| 5 to 9                                                                | 146     | 11                          | 118                                | 81                    | 13                         | 2.68   | 1.70 - 4.24             |        | 2.42  | 1.52 - 3.85             |        |
| 10+                                                                   | 208     | 16                          | 162                                | 78                    | 18                         | 2.24   | 1.53 - 3.29             | <0.001 | 2.11  | 1.42 - 3.10             |        |

\* Participants with self-reported uptake of  $\geq 1$  HAV vaccine dose(s). † Includes those identifying as bisexual, straight, or another way. †† Top two quartiles ("I am comfortable"/"I am very comfortable" from the question, "How would you best describe your current financial situation"). ¶ Behaviour modification includes self-report of any of the following from May 2022: fewer sexual partners, reduced visits to sex on premises venues or PSE (i.e. cruising grounds), and avoiding: all sex, condomless anal sex, skin-to-skin contact, or visiting clubs or crowds. § Adjusted for age-group, ethnicity, sexual orientation, educational qualifications, employment, and financial situation. \*\* uOR=Unadjusted odds ratio. aOR=adjusted odds ratio.



**Table 3.** Sociodemographic characteristics and Health-related and sexual behaviour factors associated with self-reported HBV vaccination uptake among RiSH-Mpox participants

|                                                                       | n total | % of RiSH-Mpox participants | n of HBV vaccinated participants * | % of group vaccinated | % of HBV vaccinated people | uOR ** | 95% confidence interval | P      | aOR † | 95% confidence interval | P      |
|-----------------------------------------------------------------------|---------|-----------------------------|------------------------------------|-----------------------|----------------------------|--------|-------------------------|--------|-------|-------------------------|--------|
| <b>Sociodemographic Characteristics</b>                               |         |                             |                                    |                       |                            |        |                         |        |       |                         |        |
| <b>Age-group</b>                                                      |         |                             |                                    |                       |                            |        |                         |        |       |                         |        |
| 16-29                                                                 | 176     | 13                          | 110                                | 63                    | 12                         | 0.40   | 0.27 - 0.58             |        | 0.44  | 0.30 - 0.65             | 0.343  |
| 30-44                                                                 | 486     | 36                          | 392                                | 81                    | 41                         | 1.00   |                         |        | 1.00  |                         |        |
| 45+                                                                   | 671     | 50                          | 452                                | 67                    | 47                         | 0.49   | 0.38 - 0.65             | 0.343  | 0.53  | 0.40 - 0.70             |        |
| <b>Sexual orientation</b>                                             |         |                             |                                    |                       |                            |        |                         |        |       |                         |        |
| Gay/ homosexual                                                       | 1187    | 89                          | 866                                | 73                    | 91                         | 1.00   |                         |        | 1.00  |                         |        |
| Bisexual †                                                            | 146     | 11                          | 88                                 | 60                    | 9                          | 0.56   | 0.39 - 0.80             | 0.002  | 0.57  | 0.39 - 0.82             | 0.002  |
| <b>Ethnicity</b>                                                      |         |                             |                                    |                       |                            |        |                         |        |       |                         |        |
| White                                                                 | 1223    | 92                          | 872                                | 71                    | 91                         | 1.00   |                         |        | 1.00  |                         |        |
| Other                                                                 | 110     | 8                           | 82                                 | 75                    | 9                          | 1.12   | 0.75 - 1.84             | 0.720  | 1.17  | 0.74 - 1.86             | 0.501  |
| <b>Country of Birth</b>                                               |         |                             |                                    |                       |                            |        |                         |        |       |                         |        |
| UK                                                                    | 1113    | 83                          | 796                                | 72                    | 83                         | 1.00   |                         |        | 1.00  |                         |        |
| Other                                                                 | 220     | 17                          | 158                                | 72                    | 17                         | 1.01   | 0.74 - 1.40             | 0.928  | 0.88  | 0.63 - 1.24             | 0.469  |
| <b>Country of Residence</b>                                           |         |                             |                                    |                       |                            |        |                         |        |       |                         |        |
| England                                                               | 1148    | 86                          | 824                                | 72                    | 86                         | 1.00   |                         |        | 1.00  |                         |        |
| Rest of UK                                                            | 185     | 14                          | 130                                | 70                    | 14                         | 1.01   | 0.74 - 1.40             | 0.928  | 0.95  | 0.67 - 1.35             | 0.770  |
| <b>Educational level</b>                                              |         |                             |                                    |                       |                            |        |                         |        |       |                         |        |
| Degree level or higher                                                | 495     | 37                          | 638                                | 76                    | 67                         | 1.00   |                         |        | 1.00  |                         |        |
| Below degree level                                                    | 838     | 63                          | 316                                | 64                    | 33                         | 0.55   | 0.43 - 0.71             | <0.001 | 0.59  | 0.46 - 0.76             | <0.001 |
| <b>Employment</b>                                                     |         |                             |                                    |                       |                            |        |                         |        |       |                         |        |
| Currently Employed                                                    | 1074    | 19                          | 790                                | 74                    | 83                         | 1.00   |                         |        | 1.00  |                         |        |
| Not Employed                                                          | 259     | 81                          | 164                                | 63                    | 17                         | 0.55   | 0.43 - 0.71             | <0.001 | 0.71  | 0.53 - 0.96             | 0.026  |
| <b>Household Composition</b>                                          |         |                             |                                    |                       |                            |        |                         |        |       |                         |        |
| Alone                                                                 | 506     | 38                          | 370                                | 73                    | 39                         | 1.00   |                         |        | 1.00  |                         |        |
| With Others                                                           | 827     | 62                          | 584                                | 71                    | 61                         | 0.88   | 0.69 - 1.13             | 0.325  | 0.85  | 0.66 - 1.09             | 0.195  |
| <b>Relationship Status</b>                                            |         |                             |                                    |                       |                            |        |                         |        |       |                         |        |
| Relationship                                                          | 591     | 44                          | 539                                | 91                    | 56                         | 1.00   |                         |        | 1.00  |                         |        |
| Single                                                                | 742     | 56                          | 415                                | 56                    | 44                         | 1.13   | 0.89 - 1.43             | 0.330  | 1.12  | 0.88 - 1.44             | 0.360  |
| <b>Comfortable Financial Status</b>                                   |         |                             |                                    |                       |                            |        |                         |        |       |                         |        |
| Yes ††                                                                | 693     | 52                          | 482                                | 70                    | 51                         | 1.00   |                         |        | 1.00  |                         |        |
| No                                                                    | 640     | 48                          | 472                                | 74                    | 49                         | 0.70   | 0.55 - 0.89             | 0.004  | 0.82  | 0.64 - 1.06             | 0.122  |
| <b>Health-related factors</b>                                         |         |                             |                                    |                       |                            |        |                         |        |       |                         |        |
| <b>HIV Status</b>                                                     |         |                             |                                    |                       |                            |        |                         |        |       |                         |        |
| Negative/ Unknown                                                     | 1131    | 85                          | 793                                | 70                    | 83                         | 1.00   |                         |        | 1.00  |                         |        |
| PLWHIV                                                                | 202     | 15                          | 161                                | 80                    | 17                         | 1.67   | 1.16 - 2.41             | 0.006  | 1.84  | 1.26 - 2.68             | 0.001  |
| <b>MPOX-related behaviour modification ††</b>                         |         |                             |                                    |                       |                            |        |                         |        |       |                         |        |
| No                                                                    | 626     | 47                          | 434                                | 69                    | 45                         | 1.00   |                         |        | 1.00  |                         |        |
| Yes                                                                   | 707     | 53                          | 520                                | 74                    | 55                         | 1.23   | 0.97 - 1.56             | 0.088  | 1.14  | 0.90 - 1.46             | 0.281  |
| <b>STI Positive Test</b>                                              |         |                             |                                    |                       |                            |        |                         |        |       |                         |        |
| No                                                                    | 1177    | 70                          | 816                                | 69                    | 86                         | 1.00   |                         |        | 1.00  |                         |        |
| Yes                                                                   | 156     | 30                          | 138                                | 88                    | 14                         | 3.39   | 2.04 - 5.63             | <0.001 | 3.17  | 1.90 - 5.29             | <0.001 |
| <b>Visited SHC in past year</b>                                       |         |                             |                                    |                       |                            |        |                         |        |       |                         |        |
| No                                                                    | 478     | 36                          | 232                                | 49                    | 24                         | 1.00   |                         |        | 1.00  |                         |        |
| Yes                                                                   | 855     | 64                          | 722                                | 84                    | 76                         | 5.76   | 4.45 - 7.45             | <0.001 | 5.33  | 4.10 - 6.93             | <0.001 |
| <b>STI test in past year</b>                                          |         |                             |                                    |                       |                            |        |                         |        |       |                         |        |
| No                                                                    | 405     | 30                          | 198                                | 49                    | 21                         | 1.00   |                         |        | 1.00  |                         |        |
| Yes                                                                   | 928     | 70                          | 756                                | 81                    | 79                         | 4.60   | 3.56 - 5.93             | <0.001 | 4.29  | 3.31 - 5.58             | <0.001 |
| <b>PrEP Use in Past Year</b>                                          |         |                             |                                    |                       |                            |        |                         |        |       |                         |        |
| No                                                                    | 734     | 55                          | 428                                | 58                    | 45                         | 1.00   |                         |        | 1.00  |                         |        |
| Yes                                                                   | 599     | 45                          | 526                                | 88                    | 55                         | 5.15   | 3.87 - 6.69             | <0.001 | 4.68  | 3.51 - 6.26             | <0.001 |
| <b>Sexual behaviours</b>                                              |         |                             |                                    |                       |                            |        |                         |        |       |                         |        |
| <b>Usage of chemsex-related drugs in the previous year</b>            |         |                             |                                    |                       |                            |        |                         |        |       |                         |        |
| No                                                                    | 1222    | 92                          | 864                                | 71                    | 91                         | 1.00   |                         |        | 1.00  |                         |        |
| Yes                                                                   | 111     | 8                           | 90                                 | 81                    | 9                          | 1.78   | 1.09 - 2.90             | 0.022  | 1.75  | 1.06 - 2.88             | 0.028  |
| <b>Number of Male Physical Sex Partners</b>                           |         |                             |                                    |                       |                            |        |                         |        |       |                         |        |
| none                                                                  | 100     | 8                           | 64                                 | 64                    | 7                          | 1.00   |                         |        | 1.00  |                         |        |
| 1                                                                     | 180     | 14                          | 103                                | 57                    | 11                         | 0.75   | 0.45 - 1.25             |        | 0.71  | 0.43 - 1.19             | <0.001 |
| 2 to 4                                                                | 389     | 29                          | 268                                | 69                    | 28                         | 1.25   | 0.79 - 1.98             |        | 1.16  | 0.72 - 1.86             |        |
| 5 to 9                                                                | 280     | 21                          | 208                                | 74                    | 22                         | 1.63   | 1.00 - 2.65             |        | 2.51  | 0.92 - 2.48             |        |
| 10+                                                                   | 384     | 29                          | 311                                | 81                    | 33                         | 2.40   | 1.48 - 3.88             | <0.001 | 2.10  | 1.28 - 3.44             |        |
| <b>reported use of SOP venues in the lookback period</b>              |         |                             |                                    |                       |                            |        |                         |        |       |                         |        |
| No                                                                    | 888     | 67                          | 606                                | 68                    | 64                         | 1.00   |                         |        | 1.00  |                         |        |
| Yes                                                                   | 445     | 33                          | 348                                | 78                    | 36                         | 1.67   | 1.28 - 2.18             | <0.001 | 1.51  | 1.15 - 1.99             | 0.003  |
| <b>Number of CAS partners in the lookback period (since Dec 2021)</b> |         |                             |                                    |                       |                            |        |                         |        |       |                         |        |
| none                                                                  | 401     | 30                          | 82                                 | 20                    | 9                          | 1.00   |                         |        | 1.00  |                         |        |
| 1                                                                     | 263     | 20                          | 177                                | 67                    | 19                         | 1.23   | 0.89 - 1.71             |        | 1.19  | 0.85 - 1.67             | 0.000  |
| 2 to 4                                                                | 315     | 24                          | 237                                | 75                    | 25                         | 1.82   | 1.31 - 2.52             |        | 1.83  | 1.31 - 2.56             |        |
| 5 to 9                                                                | 146     | 11                          | 115                                | 79                    | 12                         | 2.22   | 1.42 - 3.46             |        | 2.02  | 1.28 - 3.18             |        |
| 10+                                                                   | 208     | 16                          | 174                                | 84                    | 18                         | 3.06   | 2.01 - 4.65             | 0.000  | 2.91  | 1.89 - 4.47             |        |

\* Participants with self-reported uptake of ≥1 HBV vaccine dose(s). † Includes those identifying as bisexual, straight, or another way. †† Top two quartiles ("I am comfortable"/"I am very comfortable" from the question, "How would you best describe your current financial situation". ‡ Behaviour modification includes self-report of any of the following from May 2022: fewer sexual partners, reduced visits to sex on premises venues or PSE (i.e. cruising grounds), and avoiding: all sex, condomless anal sex, skin-to-skin contact, or visiting clubs or crowds. § Adjusted for age-group, ethnicity, sexual orientation, educational qualifications, employment, and financial situation. \*\* uOR=Unadjusted odds ratio. aOR=adjusted odds ratio.

**Table 4.** Sociodemographic characteristics and Health-related and sexual behaviour factors associated with self-reported HPV vaccination uptake among RiSH-Mpox participants below 45

|                                                                       | n total | % of RiSH-Mpox participants 45+ | n of HPV vaccinated participants * | % of group vaccinated | % of HPV vaccinated people | uOR ** | 95% confidence interval | P      | aOR § | 95% confidence interval | P      |
|-----------------------------------------------------------------------|---------|---------------------------------|------------------------------------|-----------------------|----------------------------|--------|-------------------------|--------|-------|-------------------------|--------|
| <b>Sociodemographic Characteristics</b>                               |         |                                 |                                    |                       |                            |        |                         |        |       |                         |        |
| <b>Age-group</b>                                                      |         |                                 |                                    |                       |                            |        |                         |        |       |                         |        |
| 16-29                                                                 | 176     | 27                              | 95                                 | 54                    | 22                         | 0.53   | 0.38 - 0.76             | <0.001 | 0.62  | 0.43 - 0.89             | 0.011  |
| 30-44                                                                 | 486     | 73                              | 334                                | 69                    | 78                         | 1.00   |                         |        | 1.00  |                         |        |
| <b>Sexual orientation</b>                                             |         |                                 |                                    |                       |                            |        |                         |        |       |                         |        |
| Gay/ homosexual                                                       | 579     | 87                              | 385                                | 66                    | 90                         | 1.00   |                         |        | 1.00  |                         |        |
| Bisexual †                                                            | 83      | 13                              | 44                                 | 53                    | 10                         | 0.57   | 0.36 - 0.90             | 0.017  | 0.67  | 0.41 - 1.08             | 0.100  |
| <b>Ethnicity</b>                                                      |         |                                 |                                    |                       |                            |        |                         |        |       |                         |        |
| White                                                                 | 589     | 89                              | 42                                 | 7                     | 10                         | 1.00   |                         |        | 1.00  |                         |        |
| Other                                                                 | 73      | 11                              | 387                                | 530                   | 90                         | 0.71   | 0.43 - 1.16             | 0.169  | 0.80  | 0.47 - 1.35             | 0.399  |
| <b>Country of Birth</b>                                               |         |                                 |                                    |                       |                            |        |                         |        |       |                         |        |
| UK                                                                    | 589     | 89                              | 93                                 | 16                    | 22                         | 1      |                         |        | 1.00  |                         |        |
| Other                                                                 | 132     | 20                              | 336                                | 255                   | 78                         | 1.38   | 0.91 - 2.08             | 0.130  | 1.32  | 0.85 - 2.05             | 0.223  |
| <b>Country of Residence</b>                                           |         |                                 |                                    |                       |                            |        |                         |        |       |                         |        |
| England                                                               | 565     | 85                              | 367                                | 65                    | 86                         | 1.00   |                         |        | 1.00  |                         |        |
| Rest of UK                                                            | 97      | 15                              | 62                                 | 64                    | 14                         | 0.96   | 0.61 - 1.50             | 0.130  | 0.99  | 0.62 - 1.58             | 0.966  |
| <b>Educational level</b>                                              |         |                                 |                                    |                       |                            |        |                         |        |       |                         |        |
| Degree level or higher                                                | 437     | 66                              | 124                                | 28                    | 29                         | 1.00   |                         |        | 1.00  |                         |        |
| Below degree level                                                    | 225     | 34                              | 305                                | 136                   | 71                         | 0.53   | 0.38 - 0.74             | <0.001 | 0.55  | 0.39 - 0.78             | 0.001  |
| <b>Employment</b>                                                     |         |                                 |                                    |                       |                            |        |                         |        |       |                         |        |
| Currently Employed                                                    | 572     | 86                              | 385                                | 67                    | 90                         | 1.00   |                         |        | 1.00  |                         |        |
| Not Employed                                                          | 90      | 14                              | 44                                 | 49                    | 10                         | 0.47   | 0.30 - 0.73             | 0.001  | 0.62  | 0.38 - 1.00             | 0.051  |
| <b>Household Composition</b>                                          |         |                                 |                                    |                       |                            |        |                         |        |       |                         |        |
| Alone                                                                 | 221     | 33                              | 156                                | 71                    | 36                         | 1.00   |                         |        | 1.00  |                         |        |
| With Others                                                           | 443     | 67                              | 273                                | 62                    | 64                         | 0.47   | 0.30 - 0.73             | 0.028  | 0.70  | 0.99 - 1.00             | 0.051  |
| <b>Relationship Status</b>                                            |         |                                 |                                    |                       |                            |        |                         |        |       |                         |        |
| Single                                                                | 343     | 52                              | 213                                | 62                    | 50                         | 1.00   |                         |        | 1.00  |                         |        |
| Relationship                                                          | 319     | 48                              | 216                                | 68                    | 50                         | 0.85   | 0.62 - 1.17             | 0.307  | 1.39  | 0.98 - 1.95             | 0.059  |
| <b>Comfortable Financial Status</b>                                   |         |                                 |                                    |                       |                            |        |                         |        |       |                         |        |
| Yes ††                                                                | 353     | 53                              | 217                                | 61                    | 51                         | 1.00   |                         |        | 1.00  |                         |        |
| No                                                                    | 309     | 47                              | 212                                | 69                    | 49                         | 0.73   | 0.53 - 1.01             | 0.055  | 0.91  | 0.65 - 1.29             | 0.603  |
| <b>Health-related factors</b>                                         |         |                                 |                                    |                       |                            |        |                         |        |       |                         |        |
| <b>HIV Status</b>                                                     |         |                                 |                                    |                       |                            |        |                         |        |       |                         |        |
| Negative/ Unknown                                                     | 584     | 88                              | 363                                | 62                    | 85                         | 1.00   |                         |        | 1.00  |                         |        |
| PLWHIV                                                                | 78      | 12                              | 66                                 | 85                    | 15                         | 3.35   | 1.77 - 6.33             | <0.001 | 3.30  | 1.70 - 6.39             | 0.059  |
| <b>MPOX-related behaviour modification ¶</b>                          |         |                                 |                                    |                       |                            |        |                         |        |       |                         |        |
| No                                                                    | 329     | 50                              | 203                                | 62                    | 47                         | 1.00   |                         |        | 1.00  |                         |        |
| Yes                                                                   | 333     | 50                              | 226                                | 68                    | 53                         | 1.31   | 0.95 - 1.81             | 0.097  | 1.17  | 0.83 - 1.64             | 0.368  |
| <b>STI Positive Test</b>                                              |         |                                 |                                    |                       |                            |        |                         |        |       |                         |        |
| No                                                                    | 568     | 86                              | 342                                | 60                    | 80                         | 1.00   |                         |        | 1.00  |                         |        |
| Yes                                                                   | 94      | 14                              | 87                                 | 93                    | 20                         | 8.21   | 3.73 - 18.06            | <0.001 | 7.77  | 3.50 - 17.28            | <0.001 |
| <b>Visited SHC in past year</b>                                       |         |                                 |                                    |                       |                            |        |                         |        |       |                         |        |
| No                                                                    | 227     | 34                              | 62                                 | 27                    | 14                         | 1.00   |                         |        | 1.00  |                         |        |
| Yes                                                                   | 435     | 66                              | 367                                | 84                    | 86                         | 14.36  | 9.72 - 21.22            | <0.001 | 14.30 | 9.51 - 21.51            | <0.001 |
| <b>STI test in past year</b>                                          |         |                                 |                                    |                       |                            |        |                         |        |       |                         |        |
| No                                                                    | 165     | 25                              | 47                                 | 28                    | 11                         | 1.00   |                         |        | 1.00  |                         |        |
| Yes                                                                   | 497     | 75                              | 382                                | 77                    | 89                         | 8.34   | 9.72 - 21.22            | <0.001 | 7.74  | 5.14 - 11.65            | <0.001 |
| <b>PrEP Use in Past Year</b>                                          |         |                                 |                                    |                       |                            |        |                         |        |       |                         |        |
| No                                                                    | 341     | 52                              | 148                                | 43                    | 34                         | 1.00   |                         |        | 1.00  |                         |        |
| Yes                                                                   | 321     | 48                              | 281                                | 88                    | 66                         | 9.16   | 6.18 - 13.59            | <0.001 | 8.99  | 5.97 - 13.53            | <0.001 |
| <b>Sexual behaviours</b>                                              |         |                                 |                                    |                       |                            |        |                         |        |       |                         |        |
| <b>Usage of chemsex-related drugs in the previous year</b>            |         |                                 |                                    |                       |                            |        |                         |        |       |                         |        |
| No                                                                    | 601     | 91                              | 382                                | 64                    | 89                         | 1.00   |                         |        | 1.00  |                         |        |
| Yes                                                                   | 61      | 9                               | 47                                 | 77                    | 11                         | 1.93   | 1.04 - 3.58             | 0.038  | 1.92  | 1.01 - 3.63             | 0.047  |
| <b>Number of Male Physical Sex Partners</b>                           |         |                                 |                                    |                       |                            |        |                         |        |       |                         |        |
| None                                                                  | 34      | 5                               | 16                                 | 47                    | 4                          | 1.00   |                         |        | 1.00  |                         |        |
| 1                                                                     | 88      | 13                              | 39                                 | 44                    | 9                          | 0.90   | 0.41 - 1.98             |        | 0.85  | 0.38 - 1.92             | <0.001 |
| 2 to 4                                                                | 200     | 30                              | 120                                | 60                    | 28                         | 1.69   | 0.81 - 3.50             |        | 1.63  | 0.77 - 3.46             |        |
| 5 to 9                                                                | 135     | 20                              | 90                                 | 67                    | 21                         | 2.25   | 1.05 - 4.82             |        | 2.12  | 0.97 - 4.63             |        |
| 10+                                                                   | 205     | 31                              | 164                                | 80                    | 38                         | 4.50   | 2.11 - 9.58             |        | 3.85  | 1.77 - 8.37             |        |
| <b>reported use of SOP venues in the lookback period</b>              |         |                                 |                                    |                       |                            |        |                         |        |       |                         |        |
| No                                                                    | 442     | 67                              | 262                                | 59                    | 61                         | 1.00   |                         |        | 1.00  |                         |        |
| Yes                                                                   | 220     | 33                              | 167                                | 76                    | 39                         | 2.17   | 1.51 - 3.11             | <0.001 | 1.84  | 1.26 - 2.67             | 0.001  |
| <b>Number of CAS partners in the lookback period (since Dec 2021)</b> |         |                                 |                                    |                       |                            |        |                         |        |       |                         |        |
| None                                                                  | 172     | 26                              | 87                                 | 51                    | 20                         | 1.00   |                         |        | 1.00  |                         |        |
| 1                                                                     | 138     | 21                              | 74                                 | 54                    | 17                         | 1.13   | 0.72 - 1.77             |        | 1.03  | 0.65 - 1.64             | <0.001 |
| 2 to 4                                                                | 157     | 24                              | 110                                | 70                    | 26                         | 2.29   | 1.45 - 3.60             |        | 2.19  | 1.37 - 3.50             |        |
| 5 to 9                                                                | 74      | 11                              | 57                                 | 77                    | 13                         | 2.28   | 1.77 - 6.08             |        | 2.74  | 1.45 - 5.16             |        |
| 10+                                                                   | 121     | 18                              | 101                                | 83                    | 24                         | 4.93   | 2.80 - 8.68             | <0.001 | 4.27  | 2.38 - 7.65             |        |

\* Participants with self-reported uptake of ≥1 HPV vaccine dose(s) in those under 45 years. † Includes those identifying as bisexual, straight, or another way. †† Top two quartiles ("I am comfortable"/"I am very comfortable" from the question, "How would you best describe your current financial situation". ¶ Behaviour modification includes self-report of any of the following from May 2022: fewer sexual partners, reduced visits to sex on premises venues or PSE (i.e. cruising grounds), and avoiding: all sex, condomless anal sex, skin-to-skin contact, or visiting clubs or crowds. § Adjusted for age-group, ethnicity, sexual orientation, educational qualifications, employment, and financial situation. \*\* uOR=Unadjusted odds ratio. aOR=adjusted odds ratio.

| Appendix A. Sociodemographic, Health-related and sexual behaviour characteristics of those who self-reported ≥1 dose of the Mpx, HAV, HBV and HPV vaccines amongst RiSH-Mpx participant |         |                            |                                  |                             |                                  |                            |                                  |                            |                                  |                            |
|-----------------------------------------------------------------------------------------------------------------------------------------------------------------------------------------|---------|----------------------------|----------------------------------|-----------------------------|----------------------------------|----------------------------|----------------------------------|----------------------------|----------------------------------|----------------------------|
|                                                                                                                                                                                         | n total | % of RiSH-Mpx participants | n of mpx vaccinated participants | % of MPOX vaccinated people | n of HAV vaccinated participants | % of HAV vaccinated people | n of HBV vaccinated participants | % of HBV vaccinated people | n of HPV vaccinated participants | % of HPV vaccinated people |
| <b>Sociodemographic Characteristics</b>                                                                                                                                                 |         |                            |                                  |                             |                                  |                            |                                  |                            |                                  |                            |
| <b>Age-group</b>                                                                                                                                                                        |         |                            |                                  |                             |                                  |                            |                                  |                            |                                  |                            |
| 16-29                                                                                                                                                                                   | 176     | 13                         | 78                               | 11                          | 101                              | 11                         | 110                              | 12                         | 95                               | 17                         |
| 30-44                                                                                                                                                                                   | 486     | 36                         | 263                              | 38                          | 358                              | 40                         | 392                              | 41                         | 334                              | 59                         |
| 45+                                                                                                                                                                                     | 671     | 50                         | 351                              | 51                          | 444                              | 49                         | 452                              | 47                         | 133                              | 24                         |
| <b>Sexual orientation</b>                                                                                                                                                               |         |                            |                                  |                             |                                  |                            |                                  |                            |                                  |                            |
| Gay/ homosexual                                                                                                                                                                         | 1187    | 89                         | 645                              | 93                          | 823                              | 91                         | 866                              | 91                         | 509                              | 91                         |
| Bisexual *                                                                                                                                                                              | 146     | 11                         | 47                               | 7                           | 80                               | 9                          | 88                               | 9                          | 53                               | 9                          |
| <b>Ethnicity</b>                                                                                                                                                                        |         |                            |                                  |                             |                                  |                            |                                  |                            |                                  |                            |
| White                                                                                                                                                                                   | 1223    | 92                         | 635                              | 92                          | 832                              | 92                         | 872                              | 91                         | 512                              | 91                         |
| Other                                                                                                                                                                                   | 110     | 8                          | 57                               | 8                           | 71                               | 8                          | 82                               | 9                          | 50                               | 9                          |
| <b>Country of Birth</b>                                                                                                                                                                 |         |                            |                                  |                             |                                  |                            |                                  |                            |                                  |                            |
| UK                                                                                                                                                                                      | 1113    | 83                         | 566                              | 82                          | 756                              | 84                         | 796                              | 83                         | 446                              | 79                         |
| Other                                                                                                                                                                                   | 220     | 17                         | 126                              | 18                          | 147                              | 16                         | 158                              | 17                         | 116                              | 21                         |
| <b>Country of Residence</b>                                                                                                                                                             |         |                            |                                  |                             |                                  |                            |                                  |                            |                                  |                            |
| England                                                                                                                                                                                 | 1148    | 86                         | 613                              | 89                          | 779                              | 86                         | 824                              | 86                         | 479                              | 85                         |
| Rest of UK                                                                                                                                                                              | 185     | 14                         | 79                               | 11                          | 124                              | 14                         | 130                              | 14                         | 83                               | 15                         |
| <b>Educational level</b>                                                                                                                                                                |         |                            |                                  |                             |                                  |                            |                                  |                            |                                  |                            |
| Degree level or higher                                                                                                                                                                  | 838     | 63                         | 199                              | 29                          | 594                              | 66                         | 638                              | 67                         | 394                              | 70                         |
| Below degree level                                                                                                                                                                      | 495     | 37                         | 493                              | 71                          | 309                              | 34                         | 316                              | 33                         | 169                              | 30                         |
| <b>Employment</b>                                                                                                                                                                       |         |                            |                                  |                             |                                  |                            |                                  |                            |                                  |                            |
| Currently Employed                                                                                                                                                                      | 1074    | 19                         | 595                              | 86                          | 749                              | 83                         | 790                              | 83                         | 497                              | 88                         |
| Not employed                                                                                                                                                                            | 259     | 81                         | 97                               | 14                          | 154                              | 17                         | 164                              | 17                         | 65                               | 12                         |
| <b>Household Composition</b>                                                                                                                                                            |         |                            |                                  |                             |                                  |                            |                                  |                            |                                  |                            |
| With others                                                                                                                                                                             | 827     | 38                         | 515                              | 74                          | 351                              | 39                         | 584                              | 61                         | 342                              | 61                         |
| Alone                                                                                                                                                                                   | 506     | 62                         | 278                              | 40                          | 552                              | 61                         | 370                              | 39                         | 220                              | 39                         |
| <b>Relationship Status</b>                                                                                                                                                              |         |                            |                                  |                             |                                  |                            |                                  |                            |                                  |                            |
| In relationship                                                                                                                                                                         | 591     | 44                         | 320                              | 46                          | 510                              | 56                         | 539                              | 56                         | 291                              | 52                         |
| Single                                                                                                                                                                                  | 742     | 56                         | 372                              | 54                          | 393                              | 44                         | 415                              | 44                         | 271                              | 48                         |
| <b>Comfortable Financial Status</b>                                                                                                                                                     |         |                            |                                  |                             |                                  |                            |                                  |                            |                                  |                            |
| Yes                                                                                                                                                                                     | 693     | 52                         | 331                              | 48                          | 453                              | 50                         | 482                              | 51                         | 282                              | 50                         |
| No                                                                                                                                                                                      | 640     | 48                         | 361                              | 52                          | 450                              | 50                         | 472                              | 49                         | 280                              | 50                         |
| <b>Sexual behaviours</b>                                                                                                                                                                |         |                            |                                  |                             |                                  |                            |                                  |                            |                                  |                            |
| <b>Usage of chemsex-related drugs in the previous year</b>                                                                                                                              |         |                            |                                  |                             |                                  |                            |                                  |                            |                                  |                            |
| No                                                                                                                                                                                      | 1222    | 92                         | 617                              | 89                          | 815                              | 90                         | 864                              | 91                         | 500                              | 89                         |
| Yes                                                                                                                                                                                     | 111     | 8                          | 75                               | 11                          | 88                               | 10                         | 90                               | 9                          | 62                               | 11                         |
| <b>Number of Male Physical Sex Partners</b>                                                                                                                                             |         |                            |                                  |                             |                                  |                            |                                  |                            |                                  |                            |
| None                                                                                                                                                                                    | 100     | 8                          | 31                               | 4                           | 64                               | 7                          | 64                               | 7                          | 28                               | 5                          |
| 1                                                                                                                                                                                       | 180     | 14                         | 41                               | 6                           | 93                               | 10                         | 103                              | 11                         | 47                               | 8                          |
| 2 to 4                                                                                                                                                                                  | 389     | 29                         | 170                              | 25                          | 256                              | 28                         | 268                              | 28                         | 159                              | 28                         |
| 5 to 9                                                                                                                                                                                  | 280     | 21                         | 180                              | 26                          | 192                              | 21                         | 208                              | 22                         | 119                              | 21                         |
| 10+                                                                                                                                                                                     | 384     | 29                         | 270                              | 39                          | 298                              | 33                         | 311                              | 33                         | 209                              | 37                         |
| <b>reported use of SOP venues in the lookback period</b>                                                                                                                                |         |                            |                                  |                             |                                  |                            |                                  |                            |                                  |                            |
| No                                                                                                                                                                                      | 888     | 67                         | 382                              | 55                          | 568                              | 63                         | 606                              | 64                         | 346                              | 62                         |
| Yes                                                                                                                                                                                     | 445     | 33                         | 310                              | 45                          | 335                              | 37                         | 348                              | 36                         | 216                              | 38                         |
| <b>Number of CAS partners in the lookback period</b>                                                                                                                                    |         |                            |                                  |                             |                                  |                            |                                  |                            |                                  |                            |
| None                                                                                                                                                                                    | 401     | 30                         | 57                               | 8                           | 245                              | 27                         | 82                               | 9                          | 119                              | 21                         |
| 1                                                                                                                                                                                       | 263     | 20                         | 99                               | 14                          | 159                              | 18                         | 177                              | 19                         | 96                               | 17                         |
| 2 to 4                                                                                                                                                                                  | 315     | 24                         | 185                              | 27                          | 219                              | 24                         | 237                              | 25                         | 143                              | 25                         |
| 5 to 9                                                                                                                                                                                  | 146     | 11                         | 109                              | 16                          | 118                              | 13                         | 115                              | 12                         | 78                               | 14                         |
| 10+                                                                                                                                                                                     | 208     | 16                         | 143                              | 21                          | 162                              | 18                         | 174                              | 18                         | 126                              | 22                         |
| <b>Health-related factors</b>                                                                                                                                                           |         |                            |                                  |                             |                                  |                            |                                  |                            |                                  |                            |
| <b>HIV Status</b>                                                                                                                                                                       |         |                            |                                  |                             |                                  |                            |                                  |                            |                                  |                            |
| Negative/ Unknown                                                                                                                                                                       | 1131    | 85                         | 575                              | 83                          | 744                              | 82                         | 793                              | 83                         | 461                              | 82                         |
| PLWHIV                                                                                                                                                                                  | 202     | 15                         | 117                              | 17                          | 159                              | 18                         | 161                              | 17                         | 101                              | 18                         |
| <b>MPOX-related behaviour modification ††</b>                                                                                                                                           |         |                            |                                  |                             |                                  |                            |                                  |                            |                                  |                            |
| No                                                                                                                                                                                      | 626     | 47                         | 247                              | 36                          | 412                              | 46                         | 434                              | 45                         | 264                              | 47                         |
| Yes                                                                                                                                                                                     | 707     | 53                         | 445                              | 64                          | 491                              | 54                         | 520                              | 55                         | 298                              | 53                         |
| <b>STI Positive Test</b>                                                                                                                                                                |         |                            |                                  |                             |                                  |                            |                                  |                            |                                  |                            |
| No                                                                                                                                                                                      | 1177    | 70                         | 568                              | 82                          | 778                              | 86                         | 816                              | 86                         | 457                              | 81                         |
| Yes                                                                                                                                                                                     | 156     | 30                         | 124                              | 18                          | 125                              | 14                         | 138                              | 14                         | 105                              | 19                         |
| <b>Visited SHC in past year</b>                                                                                                                                                         |         |                            |                                  |                             |                                  |                            |                                  |                            |                                  |                            |
| No                                                                                                                                                                                      | 478     | 36                         | 82                               | 12                          | 221                              | 24                         | 232                              | 24                         | 60                               | 11                         |
| Yes                                                                                                                                                                                     | 855     | 64                         | 610                              | 88                          | 682                              | 76                         | 722                              | 76                         | 484                              | 86                         |
| <b>STI test in past year</b>                                                                                                                                                            |         |                            |                                  |                             |                                  |                            |                                  |                            |                                  |                            |
| No                                                                                                                                                                                      | 405     | 30                         | 81                               | 12                          | 196                              | 22                         | 198                              | 21                         | 60                               | 11                         |
| Yes                                                                                                                                                                                     | 928     | 70                         | 611                              | 88                          | 707                              | 78                         | 756                              | 79                         | 502                              | 89                         |
| <b>PrEP Use in Past Year</b>                                                                                                                                                            |         |                            |                                  |                             |                                  |                            |                                  |                            |                                  |                            |
| No                                                                                                                                                                                      | 734     | 55                         | 228                              | 33                          | 415                              | 46                         | 428                              | 45                         | 201                              | 36                         |
| Yes                                                                                                                                                                                     | 599     | 45                         | 464                              | 67                          | 488                              | 54                         | 526                              | 55                         | 361                              | 64                         |

\* also includes those identifying straight, or another way. † Top two quartiles ("I am comfortable"/"I am very comfortable" from the question, "How would you best describe your current financial situation". †† Behaviour modification includes self-report of any of the following: fewer sexual partners, reduced visits to sex on premises venues or PSE and avoiding: all sex, condomless anal sex, skin-to-skin contact, or visiting clubs or crowds from May 2022.

| <b>Appendix B Vaccine uptake and association between uptake of different STI vaccine types amongst RüSH-Mpox participants</b> |      |                             |                           |       |                         |         |        |         |                         |         |        |
|-------------------------------------------------------------------------------------------------------------------------------|------|-----------------------------|---------------------------|-------|-------------------------|---------|--------|---------|-------------------------|---------|--------|
|                                                                                                                               | n    | n receiving both vaccines * | % receiving both vaccines | uOR † | 95% confidence interval |         | P      | aOR † † | 95% confidence interval |         | P      |
| <b>Any Vaccine Uptake</b>                                                                                                     | 1135 |                             | 97                        |       |                         |         |        |         |                         |         |        |
| <b>Mpox Vaccine uptake</b>                                                                                                    |      |                             |                           |       |                         |         |        |         |                         |         |        |
| Mpox                                                                                                                          | 692  |                             |                           |       |                         |         |        |         |                         |         |        |
| HAV                                                                                                                           | 903  | 558                         | 62                        | 3.57  | 2.80                    | - 4.56  | <0.001 | 3.30    | 2.57                    | - 4.25  | <0.001 |
| HBV                                                                                                                           | 954  | 581                         | 61                        | 3.76  | 2.91                    | - 4.86  | <0.001 | 3.40    | 2.61                    | - 4.42  | <0.001 |
| HPV                                                                                                                           | 562  | 387                         | 69                        | 3.38  | 2.69                    | - 4.25  | <0.001 | 4.14    | 3.16                    | - 5.42  | <0.001 |
| <b>HAV Vaccine Uptake</b>                                                                                                     | 903  |                             | 68                        |       |                         |         |        |         |                         |         |        |
| Mpox                                                                                                                          | 692  | 558                         | 81                        | 3.57  | 2.80                    | - 4.56  | <0.001 | 3.30    | 2.57                    | - 4.25  | <0.001 |
| HAV                                                                                                                           | 903  |                             |                           |       |                         |         |        |         |                         |         |        |
| HBV                                                                                                                           | 954  | 794                         | 83                        | 12.29 | 9.29                    | - 16.26 | <0.001 | 11.98   | 9.01                    | - 15.92 | <0.001 |
| HPV                                                                                                                           | 562  | 490                         | 87                        | 5.90  | 4.44                    | - 7.84  | <0.001 | 8.04    | 5.82                    | - 11.11 | <0.001 |
| <b>HBV Vaccine uptake</b>                                                                                                     | 954  |                             | 72                        |       |                         |         |        |         |                         |         |        |
| Mpox                                                                                                                          | 692  | 581                         | 84                        | 3.76  | 2.91                    | - 4.86  | <0.001 | 3.40    | 2.61                    | - 4.42  | <0.001 |
| HAV                                                                                                                           | 903  | 794                         | 88                        | 12.29 | 9.29                    | - 16.26 | <0.001 | 11.98   | 9.01                    | - 15.92 | <0.001 |
| HBV                                                                                                                           | 954  |                             |                           |       |                         |         |        |         |                         |         |        |
| HPV                                                                                                                           | 562  | 512                         | 91                        | 7.62  | 5.15                    | - 10.53 | <0.001 | 9.27    | 6.51                    | - 13.21 | <0.001 |
| <b>HPV Vaccine Uptake</b>                                                                                                     |      |                             | 42                        |       |                         |         |        |         |                         |         |        |
| Mpox                                                                                                                          | 692  | 387                         | 56                        | 3.38  | 2.69                    | - 4.25  | <0.001 | 3.30    | 2.57                    | - 4.25  | <0.001 |
| HAV                                                                                                                           | 903  | 490                         | 54                        | 5.90  | 4.44                    | - 7.84  | <0.001 | 8.04    | 5.82                    | - 11.11 | <0.001 |
| HBV                                                                                                                           | 954  | 512                         | 54                        | 7.62  | 5.52                    | - 10.53 | <0.001 | 9.27    | 6.51                    | - 13.21 | <0.001 |
| HPV                                                                                                                           | 562  |                             |                           |       |                         |         |        |         |                         |         |        |

\* Participants with self-reported uptake of  $\geq 1$  vaccine dose of both vaccine types. † uOR=Unadjusted odds ratio. aOR=adjusted odds ratio. † † Adjusted for age-group, sexual orientation, educational level, employment, ethnicity and financial situation.
